# Supplementary material
Source: Research Square preprint supplement (doi:10.21203/rs.3.rs-9616542/v1)
Supplement: Supplementary file 1 [file 3e4deac82690c5d5ec0a9861.docx]

**Table 1.** Flowering, branching and stature of *Xanthorrhoea preissii* plants at Redmond Reserve, separated into those in the closest 10 m to the roadway and those in the rest of the population, and plants in the Barrington Rd reserve recovering from fire in the previous dry season. Multiple range tests (and pairwise tests in the case of the nonparametric flowering data) were applied to the three data sets for each variable assessed. SD = standard deviation.

| **Grasstrees:** | **Unburnt within 10 m of roadway** | **Unburnt 11-63 m of roadway** | **Burnt 8-64 m of roadway** | | **Test** | | ***P*** |
| --- | --- | --- | --- | --- | --- | --- | --- |
| Sample size (total) | 20 | 122 | 144 | |  | |  |
| **% in flower** | **45a** | **18b** | **50a** | Fisher’s | | < 0.0001 | |
| Number in flower | 9 | 22 | 73 |  | |  | |
| **No. spikes per flowering**  **plant corrected for stature (/sq rt m)** | **1.93a** | **1.21b** | **1.02b** | ANOVA/  Tukey’s | | < 0.0001/  < 0.01 | |
| ± SD | 1.41 | 0.77 | 0.18 |  | |  | |
| **[Number of stems per plant** | **3.00a** | **1.91b** | **1.24c** | ANOVA/  Tukey’s | | < 0.0001/  < 0.01/0.05 | |
| ± SD | 2.22 | 1.41 | 0.62 | Not meet normality assumptions] | | | |
| **% plants with multiple stems** | **70.0a** | **56.6b** | **17.4c** | Fisher’s | | < 0.0001 | |
| Number with a single stem | 6 | 69 | 119 |  | |  | |
| **Plant stature in m** | **1.63a** | **1.47a** | **0.93b** | ANOVA/  Tukey’s | | < 0.0001/  < 0.01 | |
| ± SD | 0.52 | 1.09 | 0.50 |  | | |  |
